# Supplementary material for: How do Zimbabweans value health states?
Source: Springer Nature journal article supplement (doi:10.1186/1478-7954-1-11), 2003-12-16
Supplement: Additional file 1 [file 1478-7954-1-11-s1.doc]

# APPENDIX I: Example of cards used to describe the health states.

# CARD ONE

***MOBILITY:***

You are confined to bed

***SELF CARE:***

You are unable to wash or dress yourself

***USUAL ACTIVITIES:***

You are unable to perform your usual activities

***PAIN OR DISCOMFORT:***

You have extreme pain or discomfort

***ANXIETY OR DEPRESSION:***

You are extremely anxious or depressed

33333

S

# APPENDIX II: Detailed procedure. Instructions to interviewers

1. On the commencement of the survey, go to the area and exact stand number. Note you must go to the right stand number. You cannot choose one to either side. If no one is there you will have to choose the next number on the list. However you will have to come back at another time.
2. Enter Interviewer, Area, Stand number, Street and Street Number. Choose the cards that you will use by shuffling and taking out: 1 – very mild, 2 – mild, 2 – moderate, 2 – severe, plus 33333. (8 cards in all).
3. Go to Mainhouse first. Ask to see the head of the house or the most senior woman of the house. Introduce yourself and explain that the University of Zimbabwe is doing a survey to see how people in Glenview view illness and disability. This information will be given to the City Health Department and to other organisations that provide medical services. Are there any people in the house who have reached Form 4 or higher at school? Would they mind giving up about 30 minutes of their time to answer your questions? If they refuse, do not force them. Enter information on Form and go to next house on property. You should include everyone in the household who meets this criterion. You may do all household members at the same time. But they should not discuss their results with one another.
4. If they agree to the interview, first read the Consent to them so that they know they do not have to take part. If they now refuse, fill in Action and go to next house. If they agree put in time interview started Q at end of Form.
5. Fill in Time started and begin the questionnaire.
6. Start with the EuroQol for each person and the VAS for each person. Explain the meanings and significance of the words (see attached pamphlet).
7. Then choose five of the forms that you selected before you came in and ask them to fill in the VAS for these.
8. Proceed to the TTO: Now use all nine states that you choose.
9. Explanation for TTO:

Imagine you are ill. You can live like this for ten years and then die. Or you can be perfectly healthy for ten years and then die. Which would you choose?

All right, imagine you have very severe pain. You can live like this for ten years and then die. Or you can live in a perfectly healthy state and then die. Which would you choose?

What would you choose if you could live in pain for ten years and then die or you could live in a perfectly healthy state for 9 years and then die?

If they choose the 9 years give them the choice of 8 perfectly healthy years and then dying.

Continue until they choose the ill state. Then go up and down ½ year to determine the exact number of healthy years that is the same as living in this state for ten years.

If they say that they would rather be dead, use the reverse side of the flashcard.

1. If they continue until 0 healthy years, ask them if they would rather be dead. Then turn to the reverse side of the flash card. Now the choice is between immediate death and living in the Health State for a certain number of years followed by a number of healthy years. The more healthy years that they choose to make up for the Health State, the worse the state is.
2. Now start with the 8 cards that you chose before you came into the house.
3. Fill in the time that the interview ended.
4. Now move onto the next house or building on the same property. Fill in another questionnaire with the Area, interviewer, street, stand number and follow the same procedure.

You will be paid $20.00 for every correctly filled in questionnaire. The Supervisor will do checks during the study just to make sure that you are going to the right houses and that the questionnaires are being well filled in.

Good Luck!

# Choices for states better than death

The following are examples. Remember you can choose any time in between (such as 7 ¾ years) if this is what you feel.

10 years in this Health state or 10 years in full health

10 years in this Health state or 9 ½ years in full health

10 years in this Health state or 9 years in full health

10 years in this Health state or 8 ½ years in full health

10 years in this Health state or 8 years in full health

10 years in this Health state or 7 ½ years in full health

10 years in this Health state or 7 years in full health

10 years in this Health state or 6 ½ years in full health

10 years in this Health state or 6 years in full health

10 years in this Health state or 5 ½ years in full health

10 years in this Health state or 5 years in full health

10 years in this Health state or 4 ½ years in full health

10 years in this Health state or 4 years in full health

10 years in this Health state or 3 ½ years in full health

10 years in this Health state or 3 years in full health

10 years in this Health state or 2 ½ years in full health

10 years in this Health state or 1 years in full health

10 years in this Health state or ½ year in full health

10 years in this Health state or Immediate death

If you think that the state is actually worse than death and you would rather die than be in this state, turn the page.

# Choices for states worse than death

The following are examples. Remember you can choose any time in between (such as 7 ¾ years) if this is what you feel.

| **Choice** | Or | **Followed by** |
| --- | --- | --- |
|  |  |  |
| Immediate death | ½ yrs in health state | 9 ½ yrs in perfect health |
|  |  |  |
| Immediate death | 1 yrs in health state | 9 yrs in perfect health |
|  |  |  |
| Immediate death | 1½ yrs in health state | 8½ yrs in perfect health |
|  |  |  |
| Immediate death | 2 yrs in health state | 8 yrs in perfect health |
|  |  |  |
| Immediate death | 2½ yrs in health state | 7 ½ yrs in perfect health |
|  |  |  |
| Immediate death | 3 yrs in health state | 7 yrs in perfect health |
|  |  |  |
| Immediate death | 3½ yrs in health state | 6½ yrs in perfect health |
|  |  |  |
| Immediate death | 4 yrs in health state | 6 yrs in perfect health |
|  |  |  |
| Immediate death | 4½ yrs in health state | 5 ½ yrs in perfect health |
|  |  |  |
| Immediate death | 5 yrs in health state | 5 yrs in perfect health |
|  |  |  |
| Immediate death | 5½ yrs in health state | 4½ yrs in perfect health |
|  |  |  |
| Immediate death | 6 yrs in health state | 4 yrs in perfect health |
|  |  |  |
| Immediate death | 6½ yrs in health state | 3 ½ yrs in perfect health |
|  |  |  |
| Immediate death | 7 yrs in health state | 3 yrs in perfect health |
|  |  |  |
| Immediate death | 7½ yrs in health state | 2½ yrs in perfect health |
|  |  |  |
| Immediate death | 8 yrs in health state | 2 yrs in perfect health |
|  |  |  |
| Immediate death | 8½ yrs in health state | 1½ yrs in perfect health |
|  |  |  |
| Immediate death | 9 yrs in health state | 1 yrs in perfect health |
|  |  |  |
| Immediate death | 4½ yrs in health state | 9 ½ yrs in perfect health |
|  |  |  |
| Immediate death | 9½ yrs in health state | ½ yrs in perfect health |
|  |  |  |
| Immediate death | 9 ¾ yrs in health state | ¼ yrs in perfect health |

# APPENDIX III: Information Sheet

# STUDY ON VALUES OF HEALTH STATES

# University of Zimbabwe

## What is the study about?

As we all know there is not much money around these days. It is therefore very important that when money is spent on health, it is spent where people feel it will do the most good. This study is to see how ordinary people (that includes yourself) view the importance of different types of illness and disability. You are being asked to imagine different health states and to tell us which ones you think are better and which ones you think are worse.

This is what we will ask you to do:

- First we will ask you how you rate your health today. This is to get you used to the type of questions that we will then be asking. We will then ask you to rate your health status today on a scale of 0 (worst imaginable health state) to 100 (best imaginable health state)
- Then we will ask you to rate 5 different health states that we will describe to you on the same scale.
- Lastly we will ask you to choose between living for 10 years in these health states and living for a shorter period of time in a perfectly healthy state.

Some of these states may sound strange to you. How can someone be able to walk around but not be able to dress or wash himself? How can someone stay in bed when they have no pain or discomfort? We are asking you to use your imagination. Remember that some people have problems with their bodies and have pain and cannot get out of bed. Others, like people who have psychiatric problems or who are very slow in learning, may have other types of problems. Try to think of people who might have the problems described. There are also some people who do not feel worried or anxious, even if they are very ill. These might be people who do not understand what is happening to them, or maybe they believe that they will get better. Other people may be so anxious and depressed that they are unable to do any of their usual activities.

In some cases you might feel that you would rather be dead than live in the health state described. Then you will be asked to choose between dying immediately or living in this health state for a number of years followed by a number of years in full health.

All these procedures will be explained to you again during the interview.

We know that this study takes time and that you are busy. We would like to thank you very much for helping us. We hope that the information you give us will help the people who plan health services to decide the best way to spend your money.

Thank you.
